# Supplementary material for: A multiplexed gas exchange system for increased throughput of photosynthetic capacity measurements
Source: PubMed Central journal article supplement (PMC6131801; doi:10.1186/s13007-018-0347-y), 2018-09-11
Supplement: 13007_2018_347_MOESM3_ESM.pdf [file 13007_2018_347_MOESM3_ESM.pdf]

### Supporting Information File S3

William T. Salter et al. ("A multiplexed gas exchange system for increased throughput of photosynthetic capacity")

Contents: list of genotypes used in test of OCTOflux system described in main manuscript.

| genotype # | name/identifier         | pedigree                                                             |
|------------|-------------------------|----------------------------------------------------------------------|
| 2          | DBW16                   | DBW16                                                                |
| 4          | PBW502                  | PBW502                                                               |
| 6          | SOKOLL                  | SOKOLL                                                               |
| 7          | MACE                    | MACE                                                                 |
| 9          | WAXWING*2/KIRITATI      | WAXWING*2/KIRITATI                                                   |
| 10         | 2.49/CUNNINGHAM/KENNEDY | 2.49/CUNNINGHAM/KENNEDY                                              |
| 11         | PBI09C016-BC-DH4        | 2.49/CUNNINGHAM/KENNEDY/3/2.49/CUNNINGHAM/KENNEDY /2/ 35880 M C18644 |
| 12         | PBI09C018-BC-DH2        | 2.49/CUNNINGHAM/KENNEDY/3/2.49/CUNNINGHAM/KENNEDY /2/ 35883 M500110  |
| 14         | PBI09C004-BC-DH23       | BERKUT/2/BERKUT / 35883 M500110                                      |
| 15         | PBI09C004-BC-DH24       | BERKUT/2/BERKUT / 35883 M500110                                      |
| 16         | PBI09C004-BC-DH74       | BERKUT/2/BERKUT / 35883 M500110                                      |
| 18         | PBI09C004-BC-DH78       | BERKUT/2/BERKUT / 35883 M500110                                      |
| 19         | PBI09C004-BC-DH106      | BERKUT/2/BERKUT / 35883 M500110                                      |
| 20         | PBI09C004-BC-DH117      | BERKUT/2/BERKUT / 35883 M500110                                      |
| 21         | PBI09C004-BC-DH118      | BERKUT/2/BERKUT / 35883 M500110                                      |
| 22         | PBI09C004-BC-DH1        | BERKUT/2/BERKUT / 35883 M500110                                      |
| 23         | PBI09C004-BC-DH51       | BERKUT/2/BERKUT / 35883 M500110                                      |
| 25         | PBI09C001-BC-DH9        | BERKUT/2/BERKUT / 35880 M C18644                                     |
| 26         | PBI09C001-BC-DH58       | BERKUT/2/BERKUT / 35880 M C18644                                     |
| 27         | PBI09C001-BC-DH64       | BERKUT/2/BERKUT / 35880 M C18644                                     |
| 29         | PBI09C001-BC-DH46       | BERKUT/2/BERKUT / 35880 M C18644                                     |
| 30         | PBI09C045-BC-DH7        | DBW16 /2/DBW16 / 18341 KC75                                          |
| 31         | PBI09C045-BC-DH13       | DBW16 /2/DBW16 / 18341 KC75                                          |

|    |                        |                               |
|----|------------------------|-------------------------------|
| 32 | PBI09C045-BC-DH15      | DBW16 /2/DBW16 / 18341 KC75   |
| 33 | PBI09C045-BC-DH28      | DBW16 /2/DBW16 / 18341 KC75   |
| 34 | PBI09C045-BC-DH30      | DBW16 /2/DBW16 / 18341 KC75   |
| 35 | PBI09C045-BC-DH31      | DBW16 /2/DBW16 / 18341 KC75   |
| 36 | PBI09C043-BC-DH21      | DBW16 /2/DBW16 / 21758 KC75   |
| 39 | PBI09C043-BC-DH28      | DBW16 /2/DBW16 / 21758 KC75   |
| 43 | PBI09C049-BC-DH5       | DBW17 /2/DBW17 / 19385 KC79   |
| 44 | PBI09C049-BC-DH6       | DBW17 /2/DBW17 / 19385 KC80   |
| 45 | PBI09C048-BC-DH11      | DBW17 /2/DBW17 / 21758 KC75   |
| 49 | PBI09C048-BC-DH35      | DBW17 /2/DBW17 / 21758 KC75   |
| 50 | PBI09C048-BC-DH36      | DBW17 /2/DBW17 / 21758 KC75   |
| 51 | PBI09C047-BC-0C-1N-99N | DBW17//DBW17 / 18293 KC75     |
| 52 | PBI09C035-BC-DH6       | PBW502 /2/PBW502 / 19385 KC75 |
| 53 | PBI09C035-BC-DH31      | PBW502 /2/PBW502 / 19385 KC75 |
| 55 | PBI09C035-BC-DH7       | PBW502 /2/PBW502 / 19385 KC75 |
| 56 | PBI09C035-BC-DH11      | PBW502 /2/PBW502 / 19385 KC75 |
| 58 | PBI09C035-BC-DH21      | PBW502 /2/PBW502 / 19385 KC75 |
| 59 | PBI09C035-BC-DH25      | PBW502 /2/PBW502 / 19385 KC75 |
| 60 | PBI09C035-BC-DH26      | PBW502 /2/PBW502 / 19385 KC75 |
| 61 | PBI09C035-BC-DH28      | PBW502 /2/PBW502 / 19385 KC75 |
| 62 | PBI09C035-BC-DH41      | PBW502 /2/PBW502 / 19385 KC75 |
| 64 | PBI09C035-BC-DH22      | PBW502 /2/PBW502 / 19385 KC75 |
| 65 | PBI09C034-BC-DH23      | PBW502 /2/PBW502 / 21758 KC75 |
| 66 | PBI09C034-BC-DH29      | PBW502 /2/PBW502 / 21758 KC75 |
| 67 | PBI09C034-BC-DH30      | PBW502 /2/PBW502 / 21758 KC75 |
| 68 | PBI09C034-BC-DH33      | PBW502 /2/PBW502 / 21758 KC75 |
| 69 | PBI09C034-BC-DH34      | PBW502 /2/PBW502 / 21758 KC75 |
| 71 | PBI09C034-BC-DH21      | PBW502 /2/PBW502 / 21758 KC75 |
| 73 | PBI09C034-BC-DH17      | PBW502 /2/PBW502 / 21758 KC75 |

|     |                   |                                                             |
|-----|-------------------|-------------------------------------------------------------|
| 75  | PBI09C038-BC-DH4  | PBW550 /2/PBW550 / 18293 KC75                               |
| 78  | PBI09C038-BC-DH9  | PBW550 /2/PBW550 / 18293 KC75                               |
| 79  | PBI09C038-BC-DH17 | PBW550 /2/PBW550 / 18293 KC75                               |
| 80  | PBI09C038-BC-DH1  | PBW550 /2/PBW550 / 18293 KC75                               |
| 81  | PBI09C038-BC-DH10 | PBW550 /2/PBW550 / 18293 KC75                               |
| 82  | PBI09C038-BC-DH22 | PBW550 /2/PBW550 / 18293 KC75                               |
| 83  | PBI09C038-BC-DH21 | PBW550 /2/PBW550 / 18293 KC75                               |
| 84  | PBI09C039-BC-DH9  | PBW550 /2/PBW550 / 18343 KC75                               |
| 86  | PBI09C039-BC-DH47 | PBW550 /2/PBW550 / 18343 KC75                               |
| 88  | PBI09C039-BC-DH63 | PBW550 /2/PBW550 / 18343 KC75                               |
| 89  | PBI09C039-BC-DH81 | PBW550 /2/PBW550 / 18343 KC75                               |
| 90  | PBI09C010-BC-DH1  | SOKOLL/2/SOKOLL / 35879 M C18643                            |
| 93  | PBI09C010-BC-DH9  | SOKOLL/2/SOKOLL / 35879 M C18643                            |
| 95  | PBI09C010-BC-DH15 | SOKOLL/2/SOKOLL / 35879 M C18643                            |
| 96  | PBI09C010-BC-DH18 | SOKOLL/2/SOKOLL / 35879 M C18643                            |
| 97  | PBI09C010-BC-DH19 | SOKOLL/2/SOKOLL / 35879 M C18643                            |
| 98  | PBI09C008-BC-DH1  | SOKOLL/2/SOKOLL / 35883 M500110                             |
| 99  | PBI09C008-BC-DH8  | SOKOLL/2/SOKOLL / 35883 M500110                             |
| 102 | PBI09C008-BC-DH31 | SOKOLL/2/SOKOLL / 35883 M500110                             |
| 104 | PBI09C008-BC-DH35 | SOKOLL/2/SOKOLL / 35883 M500110                             |
| 105 | PBI09C008-BC-DH7  | SOKOLL/2/SOKOLL / 35883 M500110                             |
| 106 | PBI09C008-BC-DH17 | SOKOLL/2/SOKOLL / 35883 M500110                             |
| 112 | PBI09C009-BC-DH84 | SOKOLL/2/SOKOLL / 35888 M 500132                            |
| 113 | PBI09C009-BC-DH86 | SOKOLL/2/SOKOLL / 35888 M 500132                            |
| 115 | PBI09C009-BC-DH30 | SOKOLL/2/SOKOLL / 35888 M 500132                            |
| 116 | PBI09C009-BC-DH52 | SOKOLL/2/SOKOLL / 35888 M 500132                            |
| 118 | PBI09C009-BC-DH16 | SOKOLL/2/SOKOLL / 35888 M 500132                            |
| 119 | PBI09C028-BC-DH33 | WAXWING*2/KIRITATI /3/WAXWING*2/KIRITATI /2/ 35880 M C18644 |
| 121 | PBI09C028-BC-DH18 | WAXWING*2/KIRITATI /3/WAXWING*2/KIRITATI /2/ 35880 M C18644 |

|     |                             |                                                                                                                                            |
|-----|-----------------------------|--------------------------------------------------------------------------------------------------------------------------------------------|
| 122 | PBI09C028-BC-DH2            | WAXWING*2/KIRITATI /3/WAXWING*2/KIRITATI /2/ 35880 M C18644                                                                                |
| 123 | PBI09C028-BC-DH3            | WAXWING*2/KIRITATI /3/WAXWING*2/KIRITATI /2/ 35880 M C18644                                                                                |
| 124 | PBI09C028-BC-DH5            | WAXWING*2/KIRITATI /3/WAXWING*2/KIRITATI /2/ 35880 M C18644                                                                                |
| 125 | PBI09C028-BC-DH7            | WAXWING*2/KIRITATI /3/WAXWING*2/KIRITATI /2/ 35880 M C18644                                                                                |
| 128 | PBI09C028-BC-DH37           | WAXWING*2/KIRITATI /3/WAXWING*2/KIRITATI /2/ 35880 M C18644                                                                                |
| 130 | PBI09C028-BC-DH54           | WAXWING*2/KIRITATI /3/WAXWING*2/KIRITATI /2/ 35880 M C18644                                                                                |
| 131 | PBI09C026-BC-DH4            | WAXWING*2/KIRITATI /3/WAXWING*2/KIRITATI /2/ 35888 M 500132                                                                                |
| 133 | PBI09C026-BC-DH121          | WAXWING*2/KIRITATI /3/WAXWING*2/KIRITATI /2/ 35888 M 500132                                                                                |
| 134 | PBI09C026-BC-DH31           | WAXWING*2/KIRITATI /3/WAXWING*2/KIRITATI /2/ 35888 M 500132                                                                                |
| 135 | PBI09C026-BC-DH65           | WAXWING*2/KIRITATI /3/WAXWING*2/KIRITATI /2/ 35888 M 500132                                                                                |
| 137 | PBI09C026-BC-DH71           | WAXWING*2/KIRITATI /3/WAXWING*2/KIRITATI /2/ 35888 M 500132                                                                                |
| 138 | PBI09C026-BC-DH73           | WAXWING*2/KIRITATI /3/WAXWING*2/KIRITATI /2/ 35888 M 500132                                                                                |
| 139 | PBI09C026-BC-DH88           | WAXWING*2/KIRITATI /3/WAXWING*2/KIRITATI /2/ 35888 M 500132                                                                                |
| 142 | PBI09C026-BC-DH114          | WAXWING*2/KIRITATI /3/WAXWING*2/KIRITATI /2/ 35888 M 500132                                                                                |
| 143 | 31 : ZWW10                  | BABAX/LR42//BABAX/3/BABAX/LR42//BABAX/4/T.DICOCCON PI94625/AE.SQUARROSA (372)//3*PASTOR/5/T.DICOCCON PI94625/AE.SQUARROSA (372)//3*PASTOR  |
| 145 | 19 : ZIZ10                  | CBRD-3/STORK X DICOCCOIDES                                                                                                                 |
| 146 | 7 : ZWW11                   | D67.2/P66.270//AE.SQUARROSA (320)/3/CUNNINGHAM/4/VORB                                                                                      |
| 147 | 238 : ZWB13                 | FALCIN/AE.SQUARROSA (312)/3/THB/CEP7780//SHA4/LIRA/4/FRET2/5/MUU/6/MILAN/KAUZ//DHARWAR DRY/3/BAV92                                         |
| 148 | FILIN/IRENA/5/..../6/BERKUT | FILIN/IRENA/5/CNDO/R143//ENTE/MEXI_2/3/AEGILOPS SQUARROSA (TAUS)/4/WEAVER/6/BERKUT                                                         |
| 149 | 135 : ZWW10                 | GOUBARA-1/2*SOKOLL                                                                                                                         |
| 150 | 27 : ZIZ13                  | KAUZ/PASTOR/3/ALTAR 84/AEGILOPS SQUARROSA (TAUS)//OPATA                                                                                    |
| 151 | 28 : ZIZ13                  | KAUZ/PASTOR/3/ALTAR 84/AEGILOPS SQUARROSA (TAUS)//OPATA                                                                                    |
| 153 | 334 : ZWB13                 | SOKOLL/3/PASTOR//HXL7573/2*BAU/4/PARUS/PASTOR                                                                                              |
| 154 | 315 : ZWB13                 | SOKOLL/WBLL1/4/ATTILA/3/WEAVER*2/TSC//WEAVER                                                                                               |
| 155 | 306 : ZWB13                 | VEE/MJI//2*TUI/3/PASTOR/4/BERKUT/11/CROC_1/AE.SQUARROSA (213)//PGO/10/ATTILA*2/9/KT/BAGE//FN/U/3/BZA/4/TRM/5/ALDAN/6/SERI/7/VEE#10/8/OPATA |
| 158 | ACIAR09PBI C27-OC-ON-13N    | DBW16/ANNUELLO                                                                                                                             |
| 160 | ACIAR09PBI C04-16C-DH17     | PBW550//C80.1/*2Batavia                                                                                                                    |

|     |                          |                                                                 |
|-----|--------------------------|-----------------------------------------------------------------|
| 161 | ACIAR09PBI C04-23C-DH7   | PBW550//C80.1/*2Batavia                                         |
| 163 | ACIAR09PBI C08-0C-0N-11N | PBW550/LANG                                                     |
| 164 | ACIAR09PBI C06-0C-0N-2N  | PBW550/PAVON                                                    |
| 167 | 89 : ZIZ13               | ATTILA-7/KATILA-12                                              |
| 169 | 92 : ZWB13               | MUU/FRNCLN//FRANCOLIN #1                                        |
| 171 | 171 : ZWB13              | QUAIU/BECARD//BECARD                                            |
| 176 | 35 : ZWB14               | ROLF07*2/PAURAQ                                                 |
| 177 | 43 : ZWB14               | SUP152/2*DANPHE #1                                              |
| 179 | 103 : ZWB14              | PAURAQ/3/KIRITATI//PRL/2*PASTOR/4/PAURAQUE #1                   |
| 180 | 142 : ZWB14              | PRL/2*PASTOR/4/CHOIX/STAR/3/HE1/3*CNO79//2*SERI/5/2*PAURAQUE #1 |
| 183 | SPITFIRE                 | SPITFIRE                                                        |
| 185 | 39: ZIG14                | 02W50807/4/PFAU/SERI.1B//AMAD/3/WAXWING                         |
| 187 | 18: CWA15                | HUBARA-7/4/CHEN/AEGILOPS SQUARROSA (TAUS)//BCN/3/KAUZ           |
| 188 | 71: CWA15                | KAUZ/SAMAR-15//RDWG/MILAN                                       |
| 189 | 91: CWA15                | JAWAHIR-1/GIRWILL-5                                             |
| 190 | SUN691I                  | SUN691I                                                         |
| 192 | F946                     |                                                                 |
| 193 | F589                     |                                                                 |
| 194 | F561                     |                                                                 |
| 195 | F1036                    |                                                                 |
| 196 | F550                     |                                                                 |
| 199 | PASCAL                   |                                                                 |
| 202 | F1572                    |                                                                 |
| 205 | BOLAC                    |                                                                 |
| 206 | BEAUFORT                 |                                                                 |
| 207 | GREGORY                  |                                                                 |
| 208 | F1222                    |                                                                 |
| 210 | F808                     |                                                                 |
| 212 | F883                     |                                                                 |

|     |         |  |
|-----|---------|--|
| 213 | F656    |  |
| 214 | F1181   |  |
| 216 | F1431   |  |
| 218 | F406    |  |
| 220 | F233    |  |
| 221 | F1178   |  |
| 224 | F1536   |  |
| 226 | F1303   |  |
| 227 | F1501   |  |
| 229 | F658    |  |
| 230 | F764    |  |
| 233 | F235    |  |
| 234 | F455    |  |
| 237 | F979    |  |
| 238 | F788    |  |
| 239 | F907    |  |
| 241 | F1265   |  |
| 242 | F1579   |  |
| 243 | F1587   |  |
| 244 | F836    |  |
| 246 | F1584   |  |
| 247 | C1061+  |  |
| 248 | C1061-  |  |
| 250 | C10710- |  |
